# Supplementary material for: Relationship between CAD Risk Genotype in the Chromosome 9p21 Locus and Gene Expression. Identification of Eight New ANRIL Splice Variants
Source: PubMed Central journal article supplement (PMC2765615; doi:10.1371/journal.pone.0007677), 2009-11-02

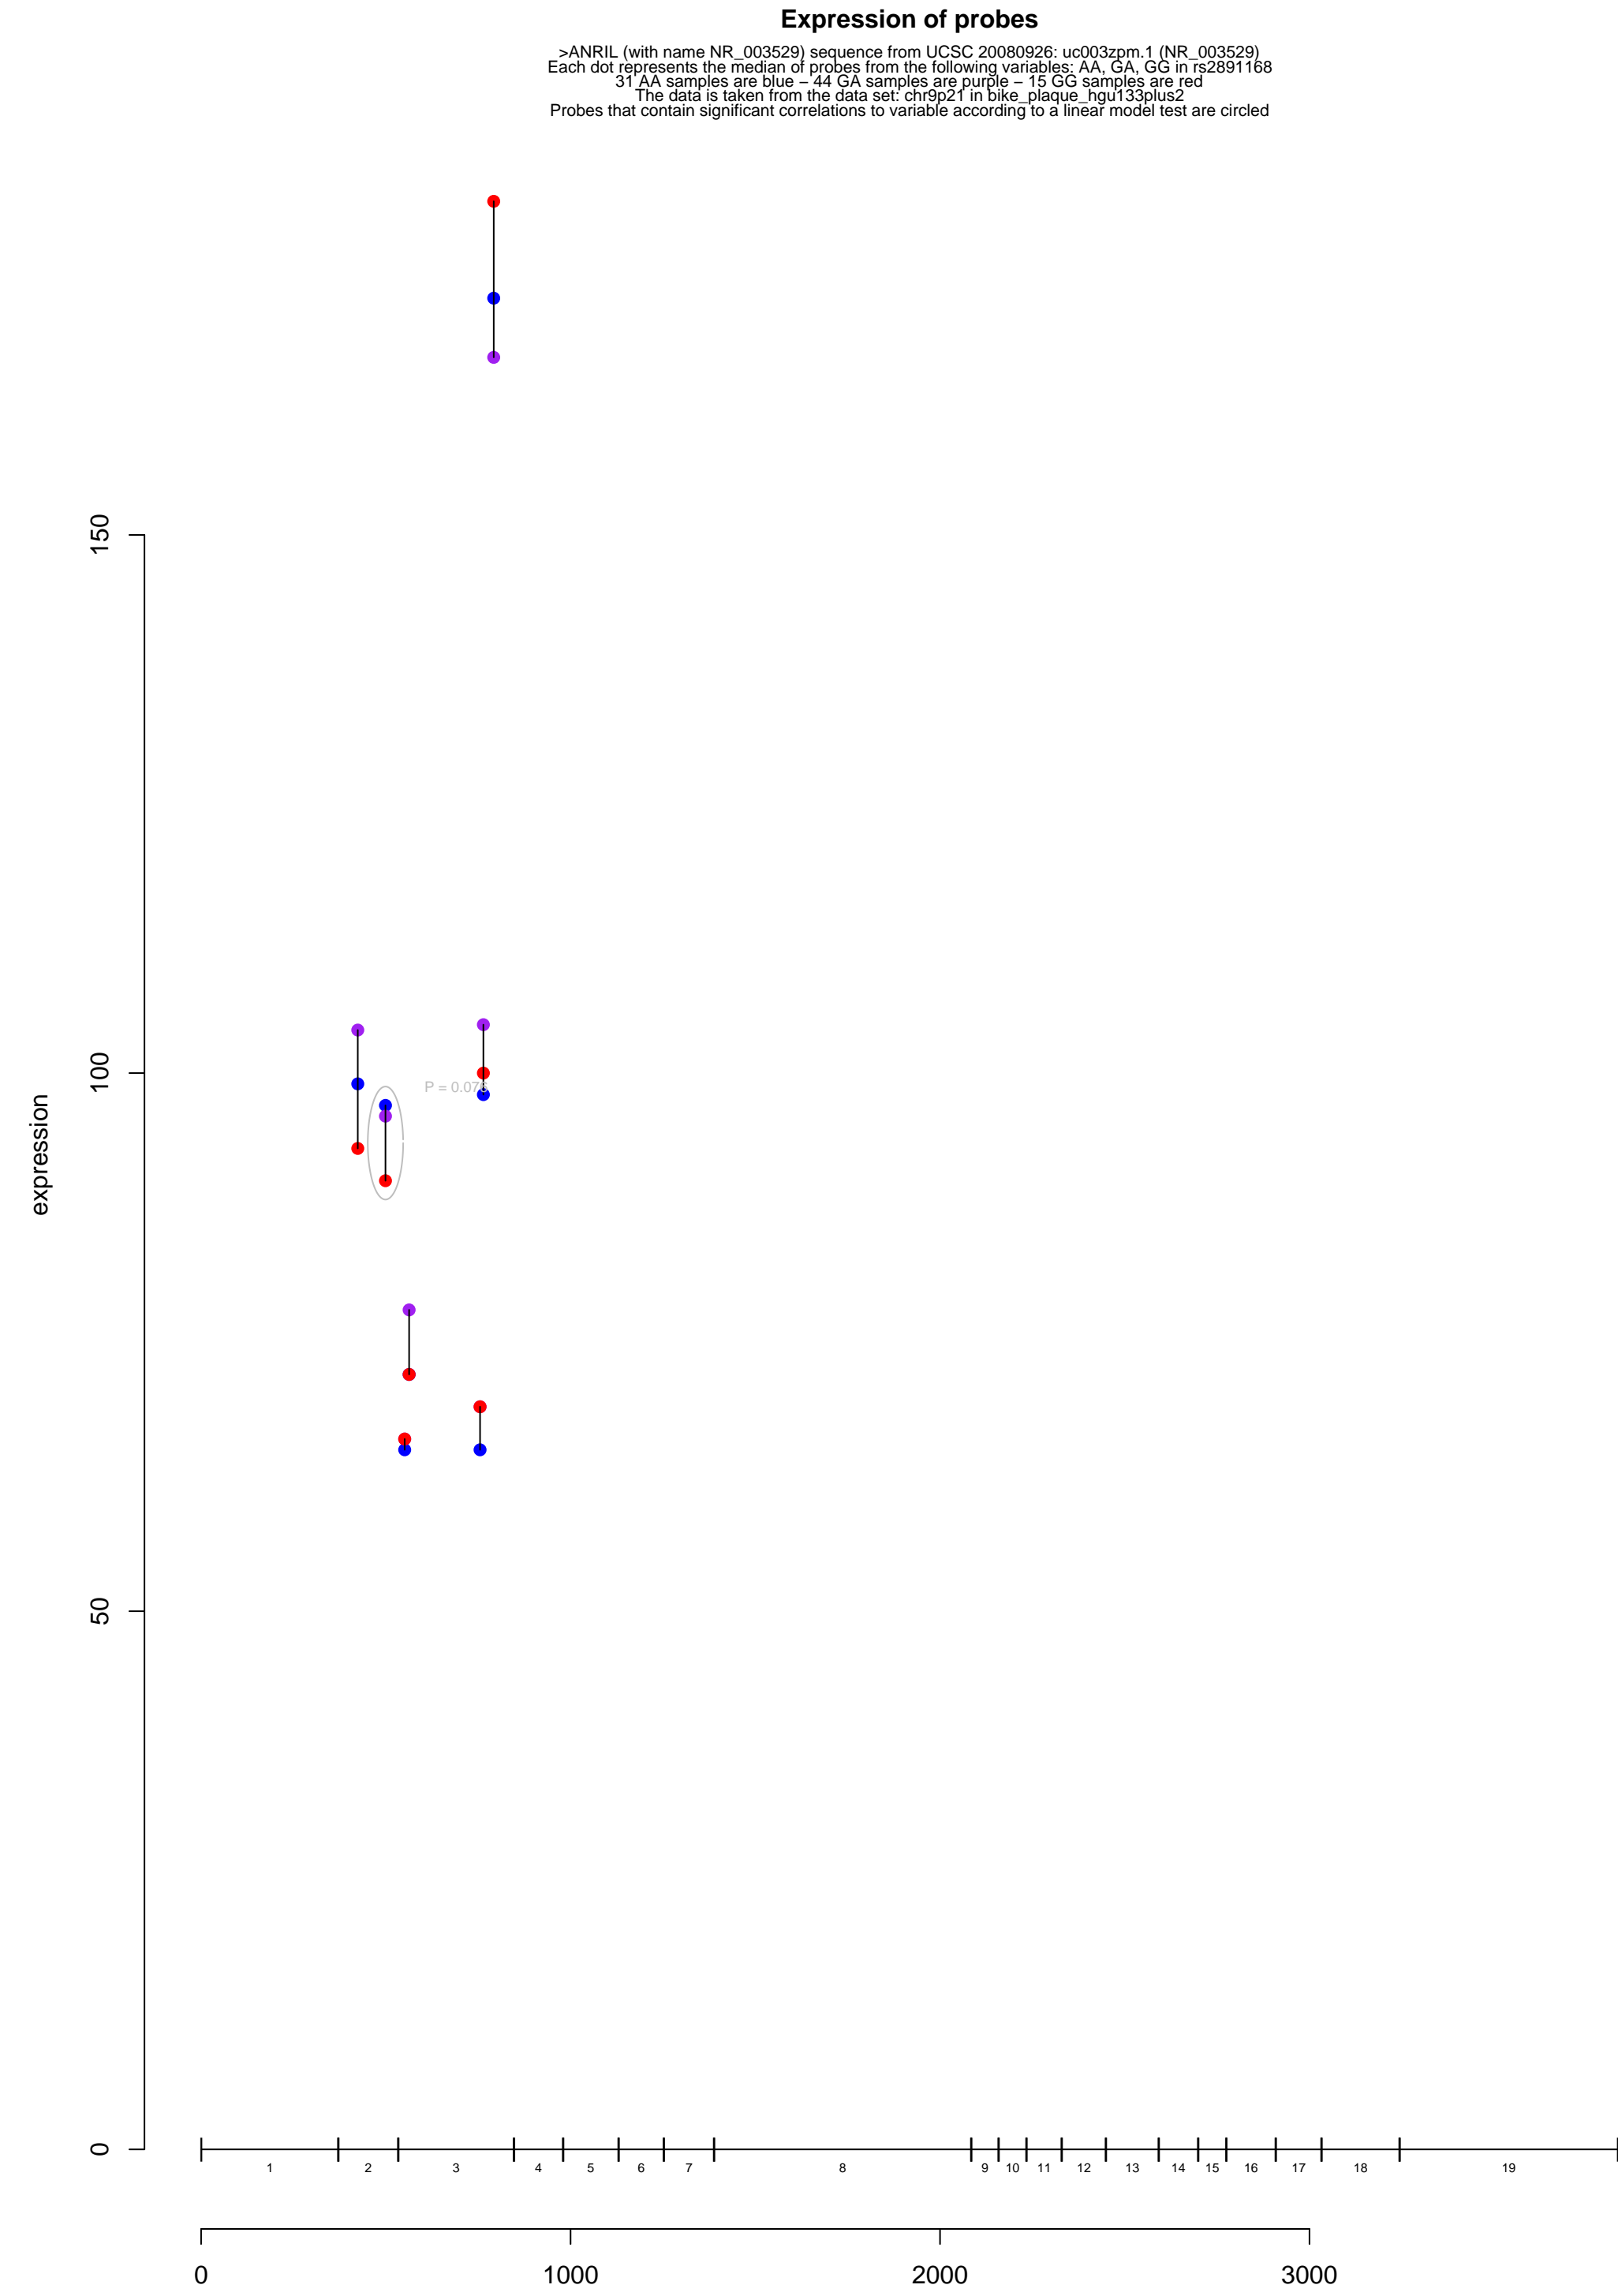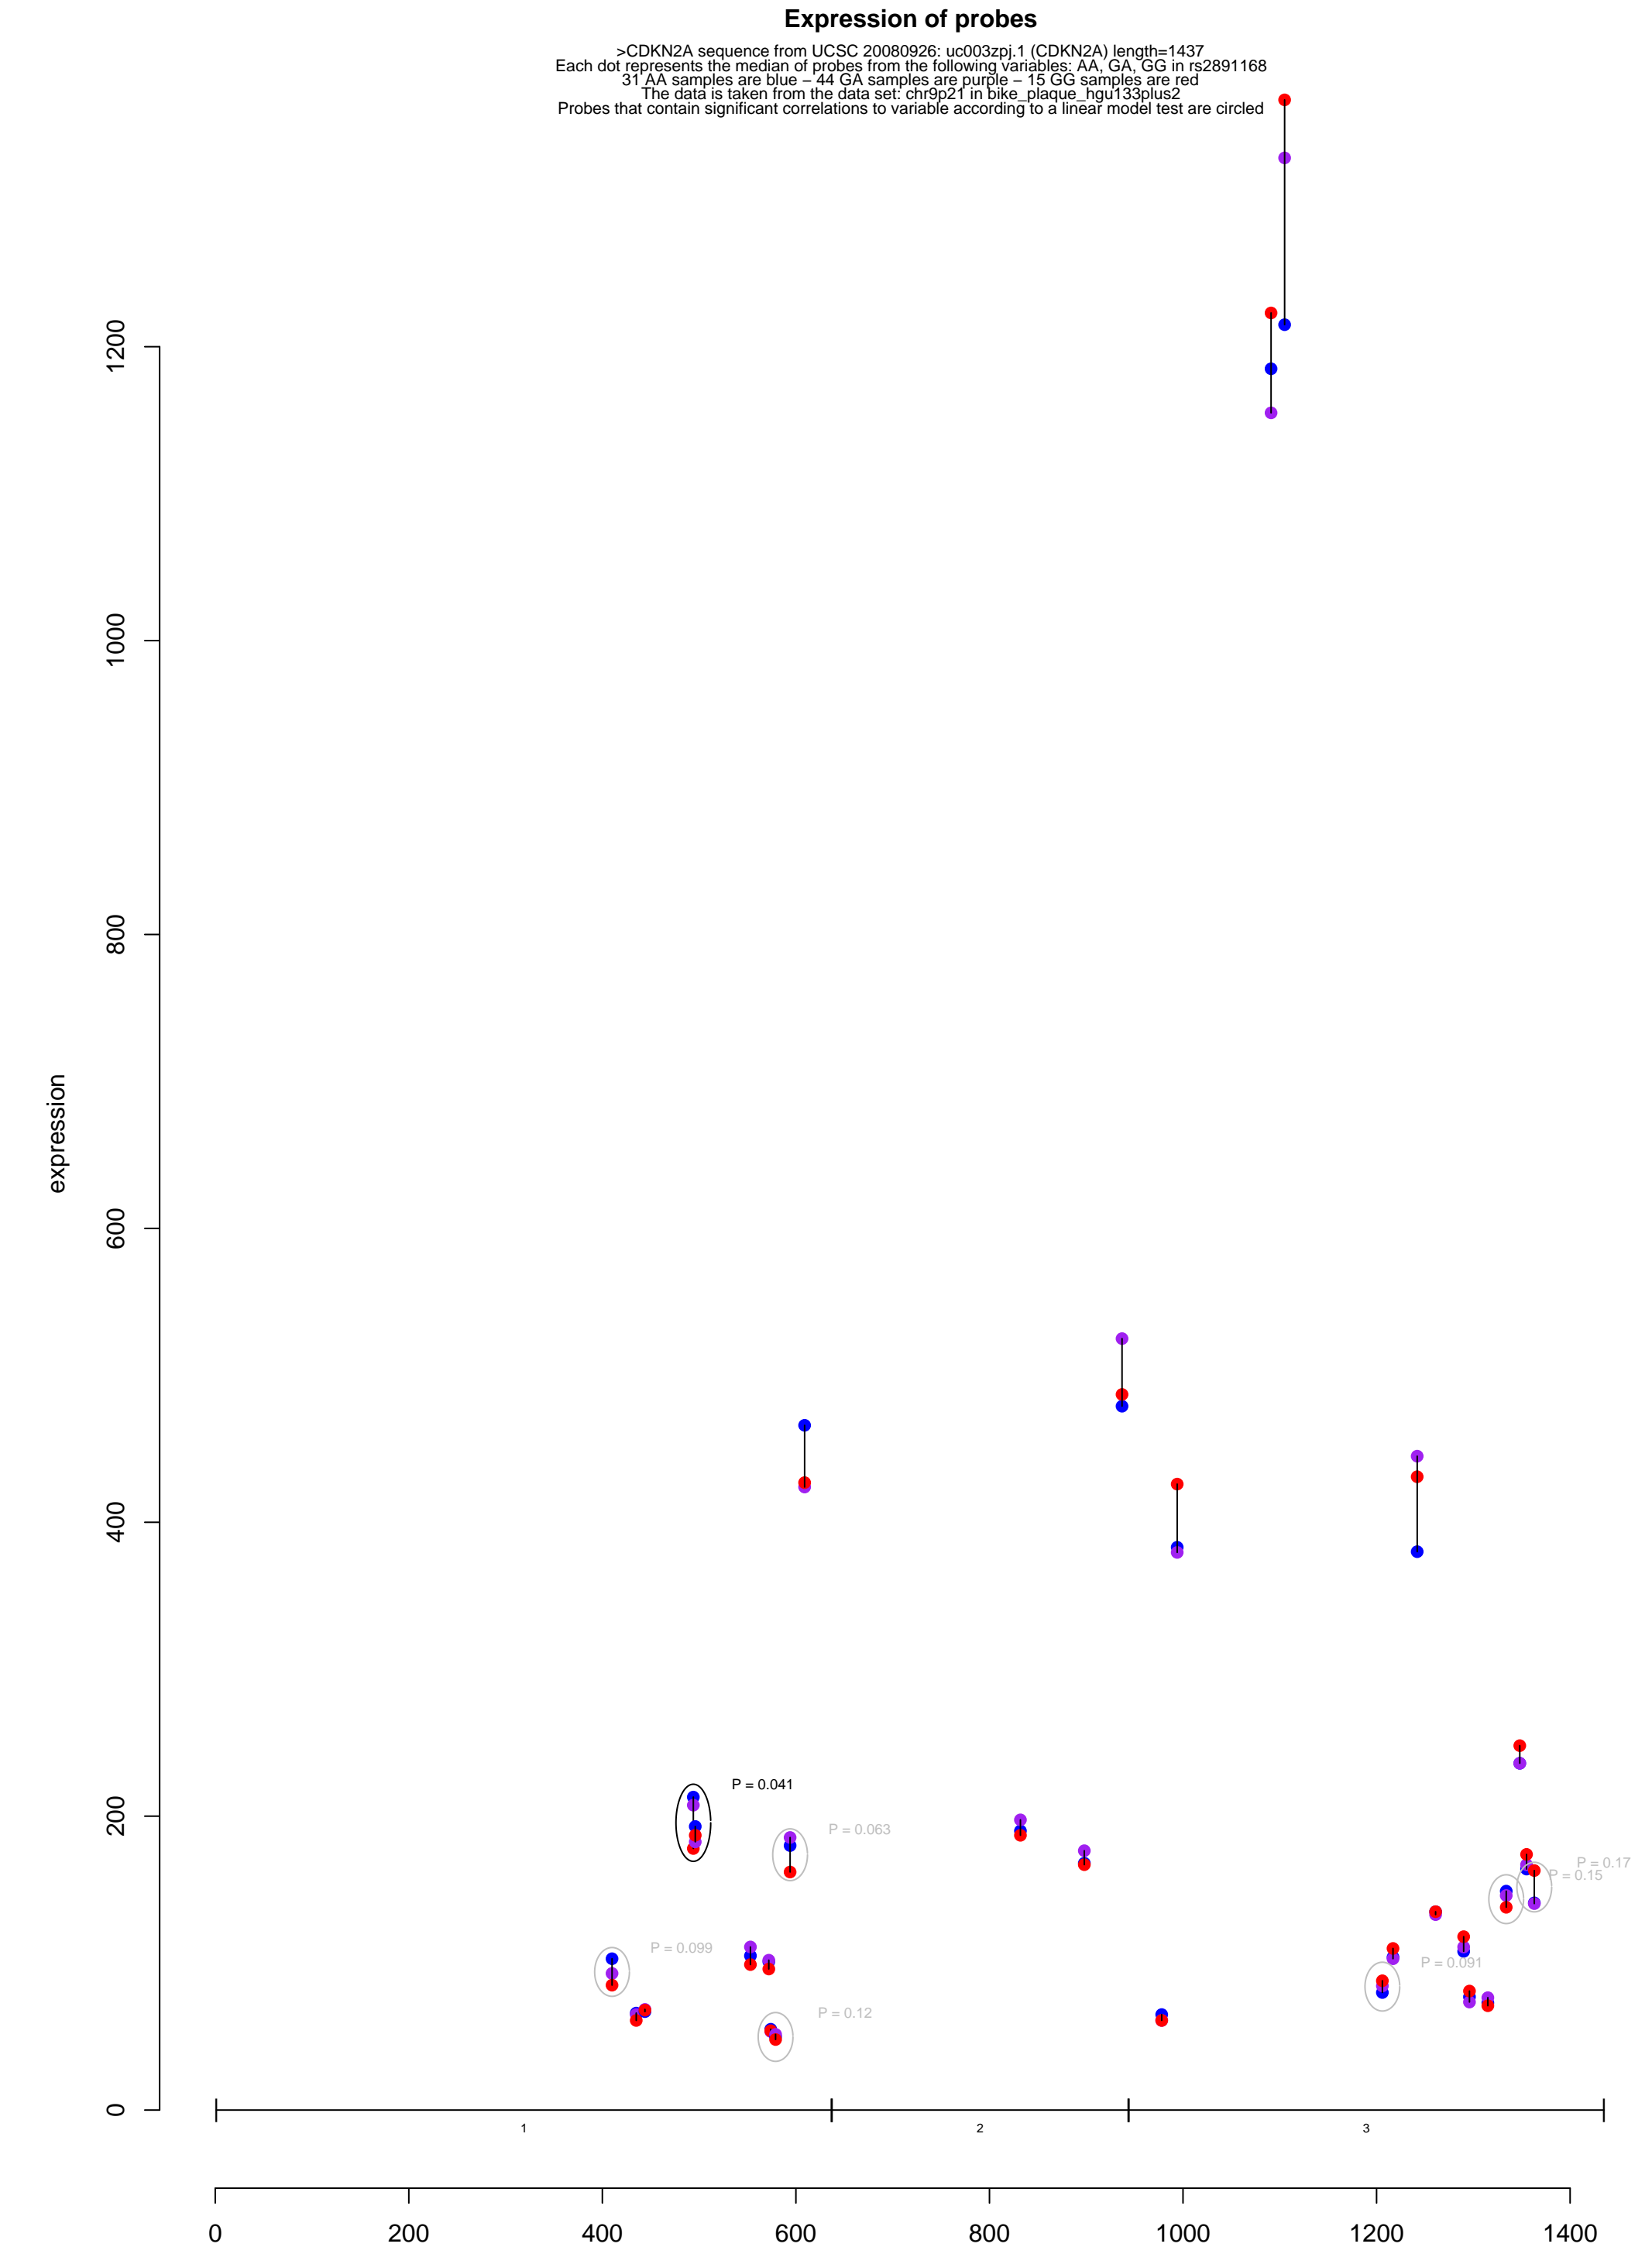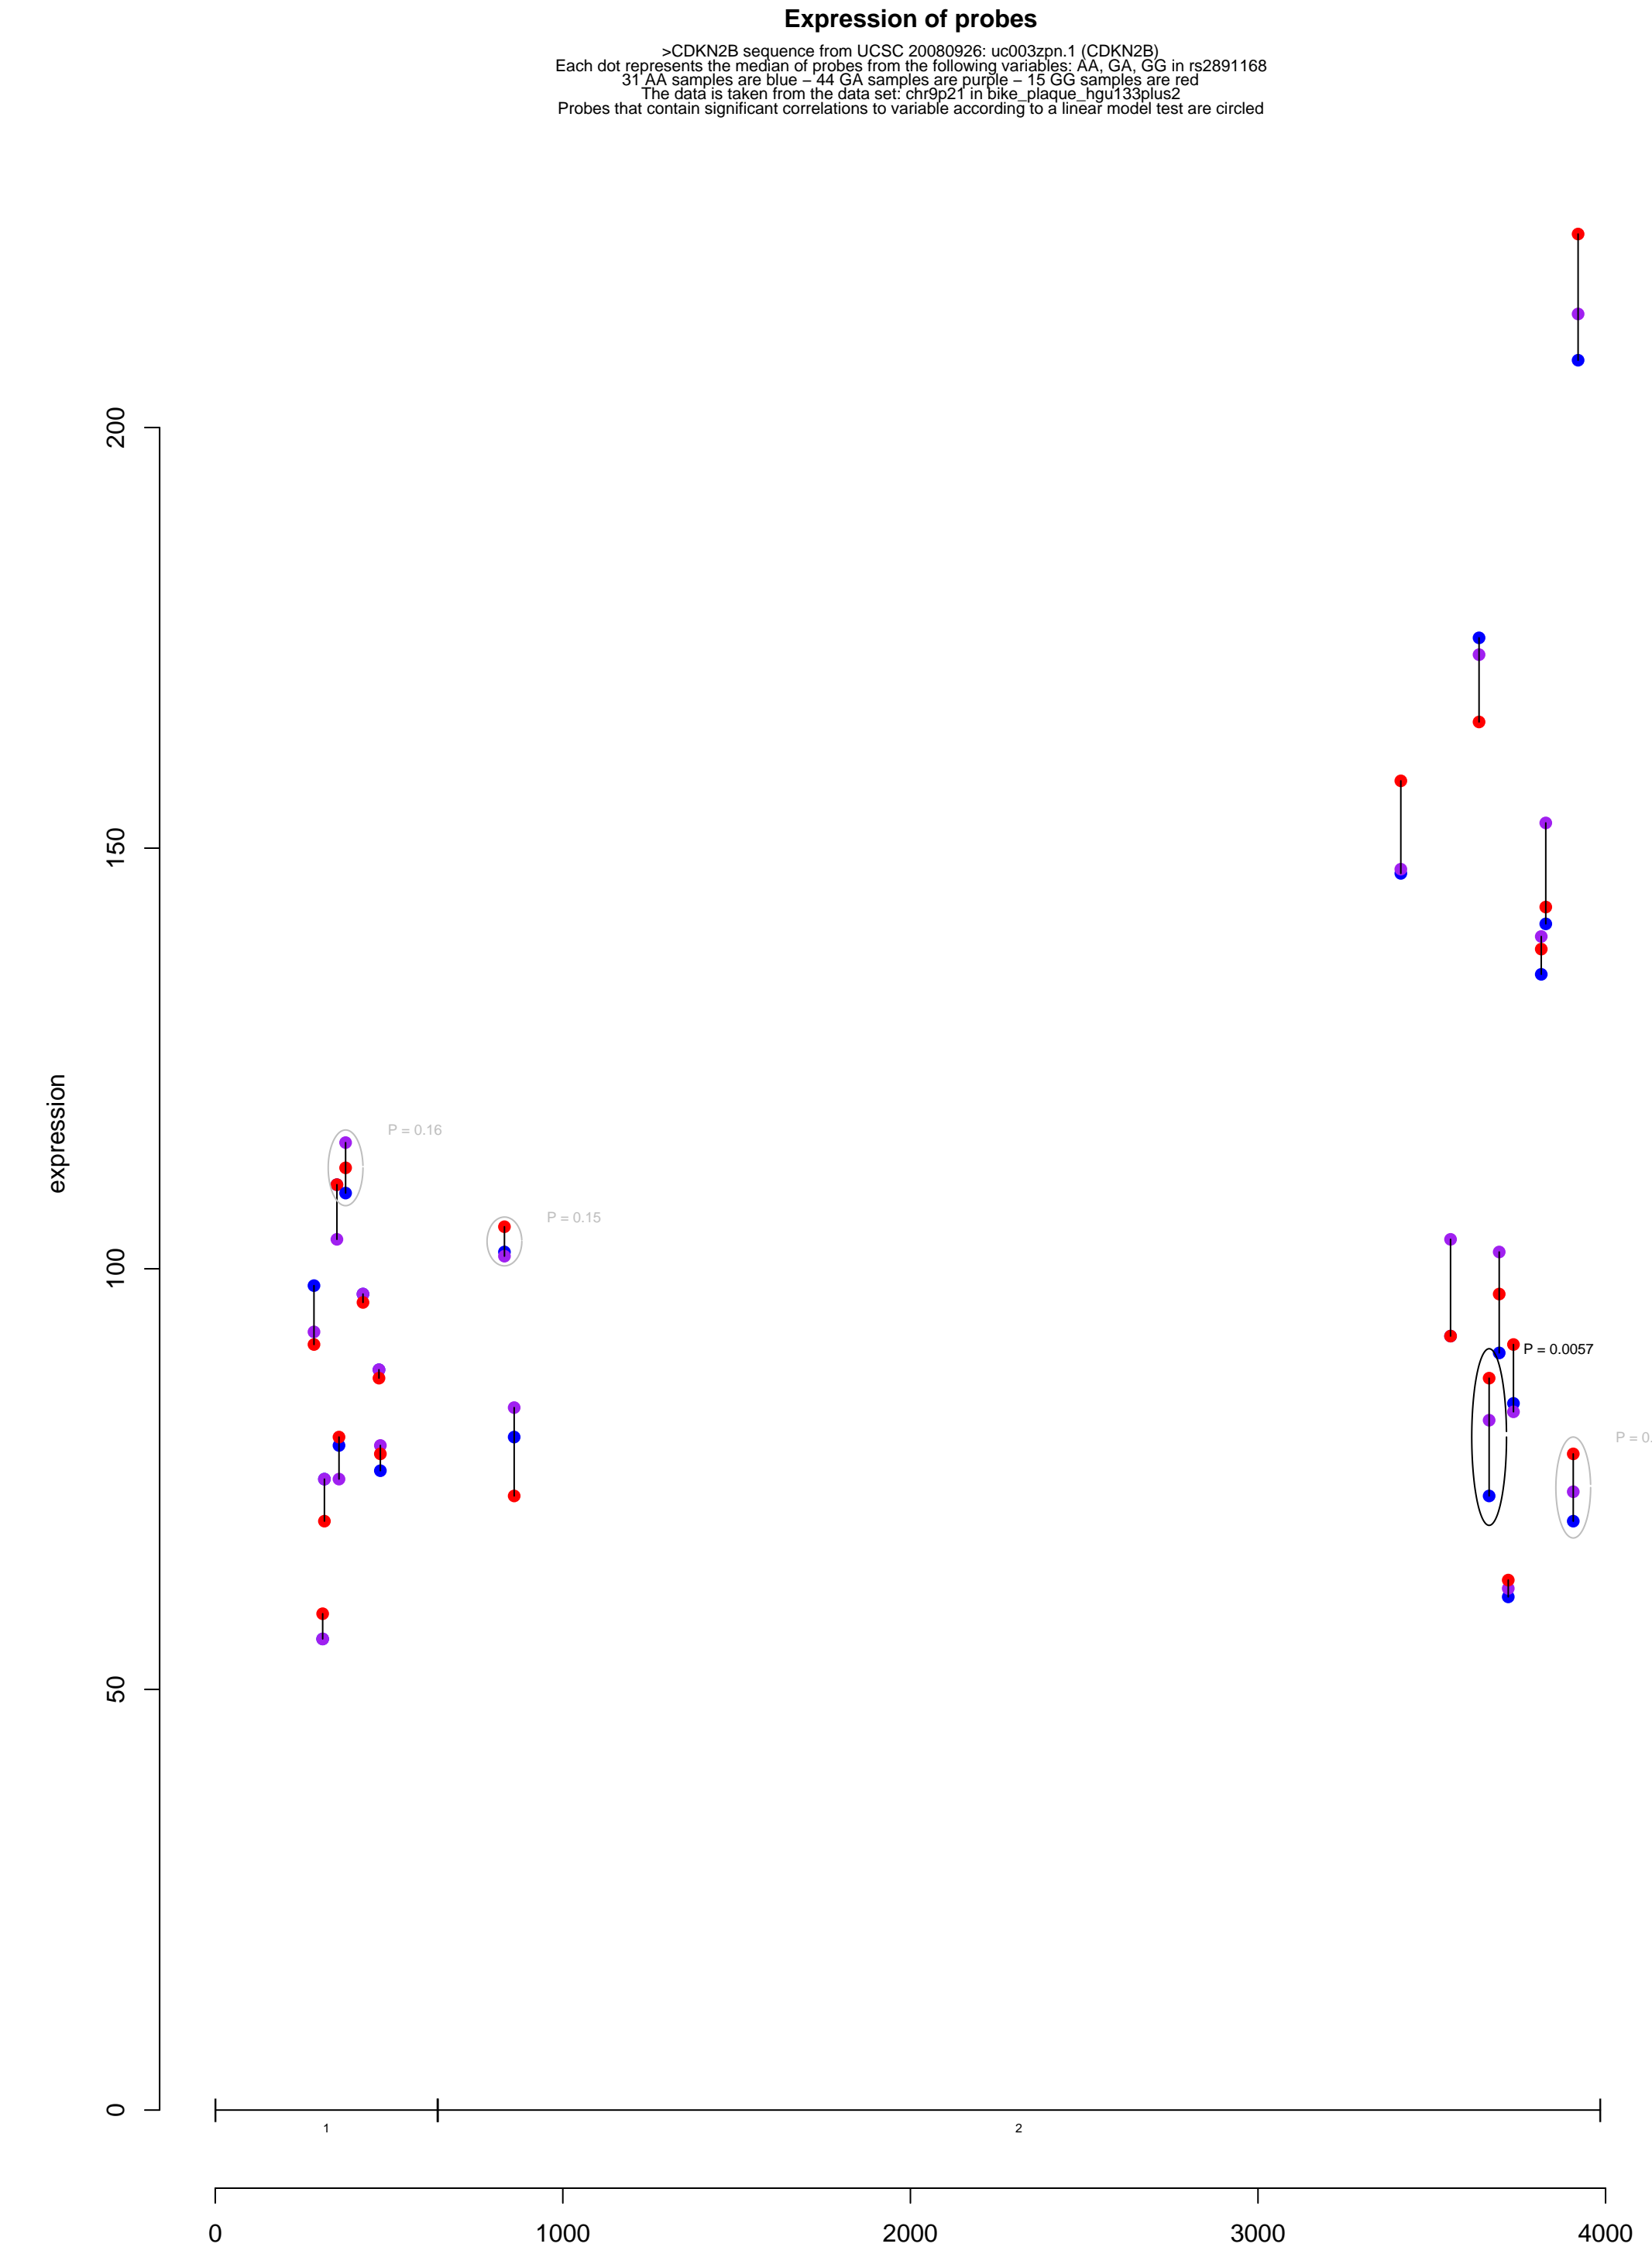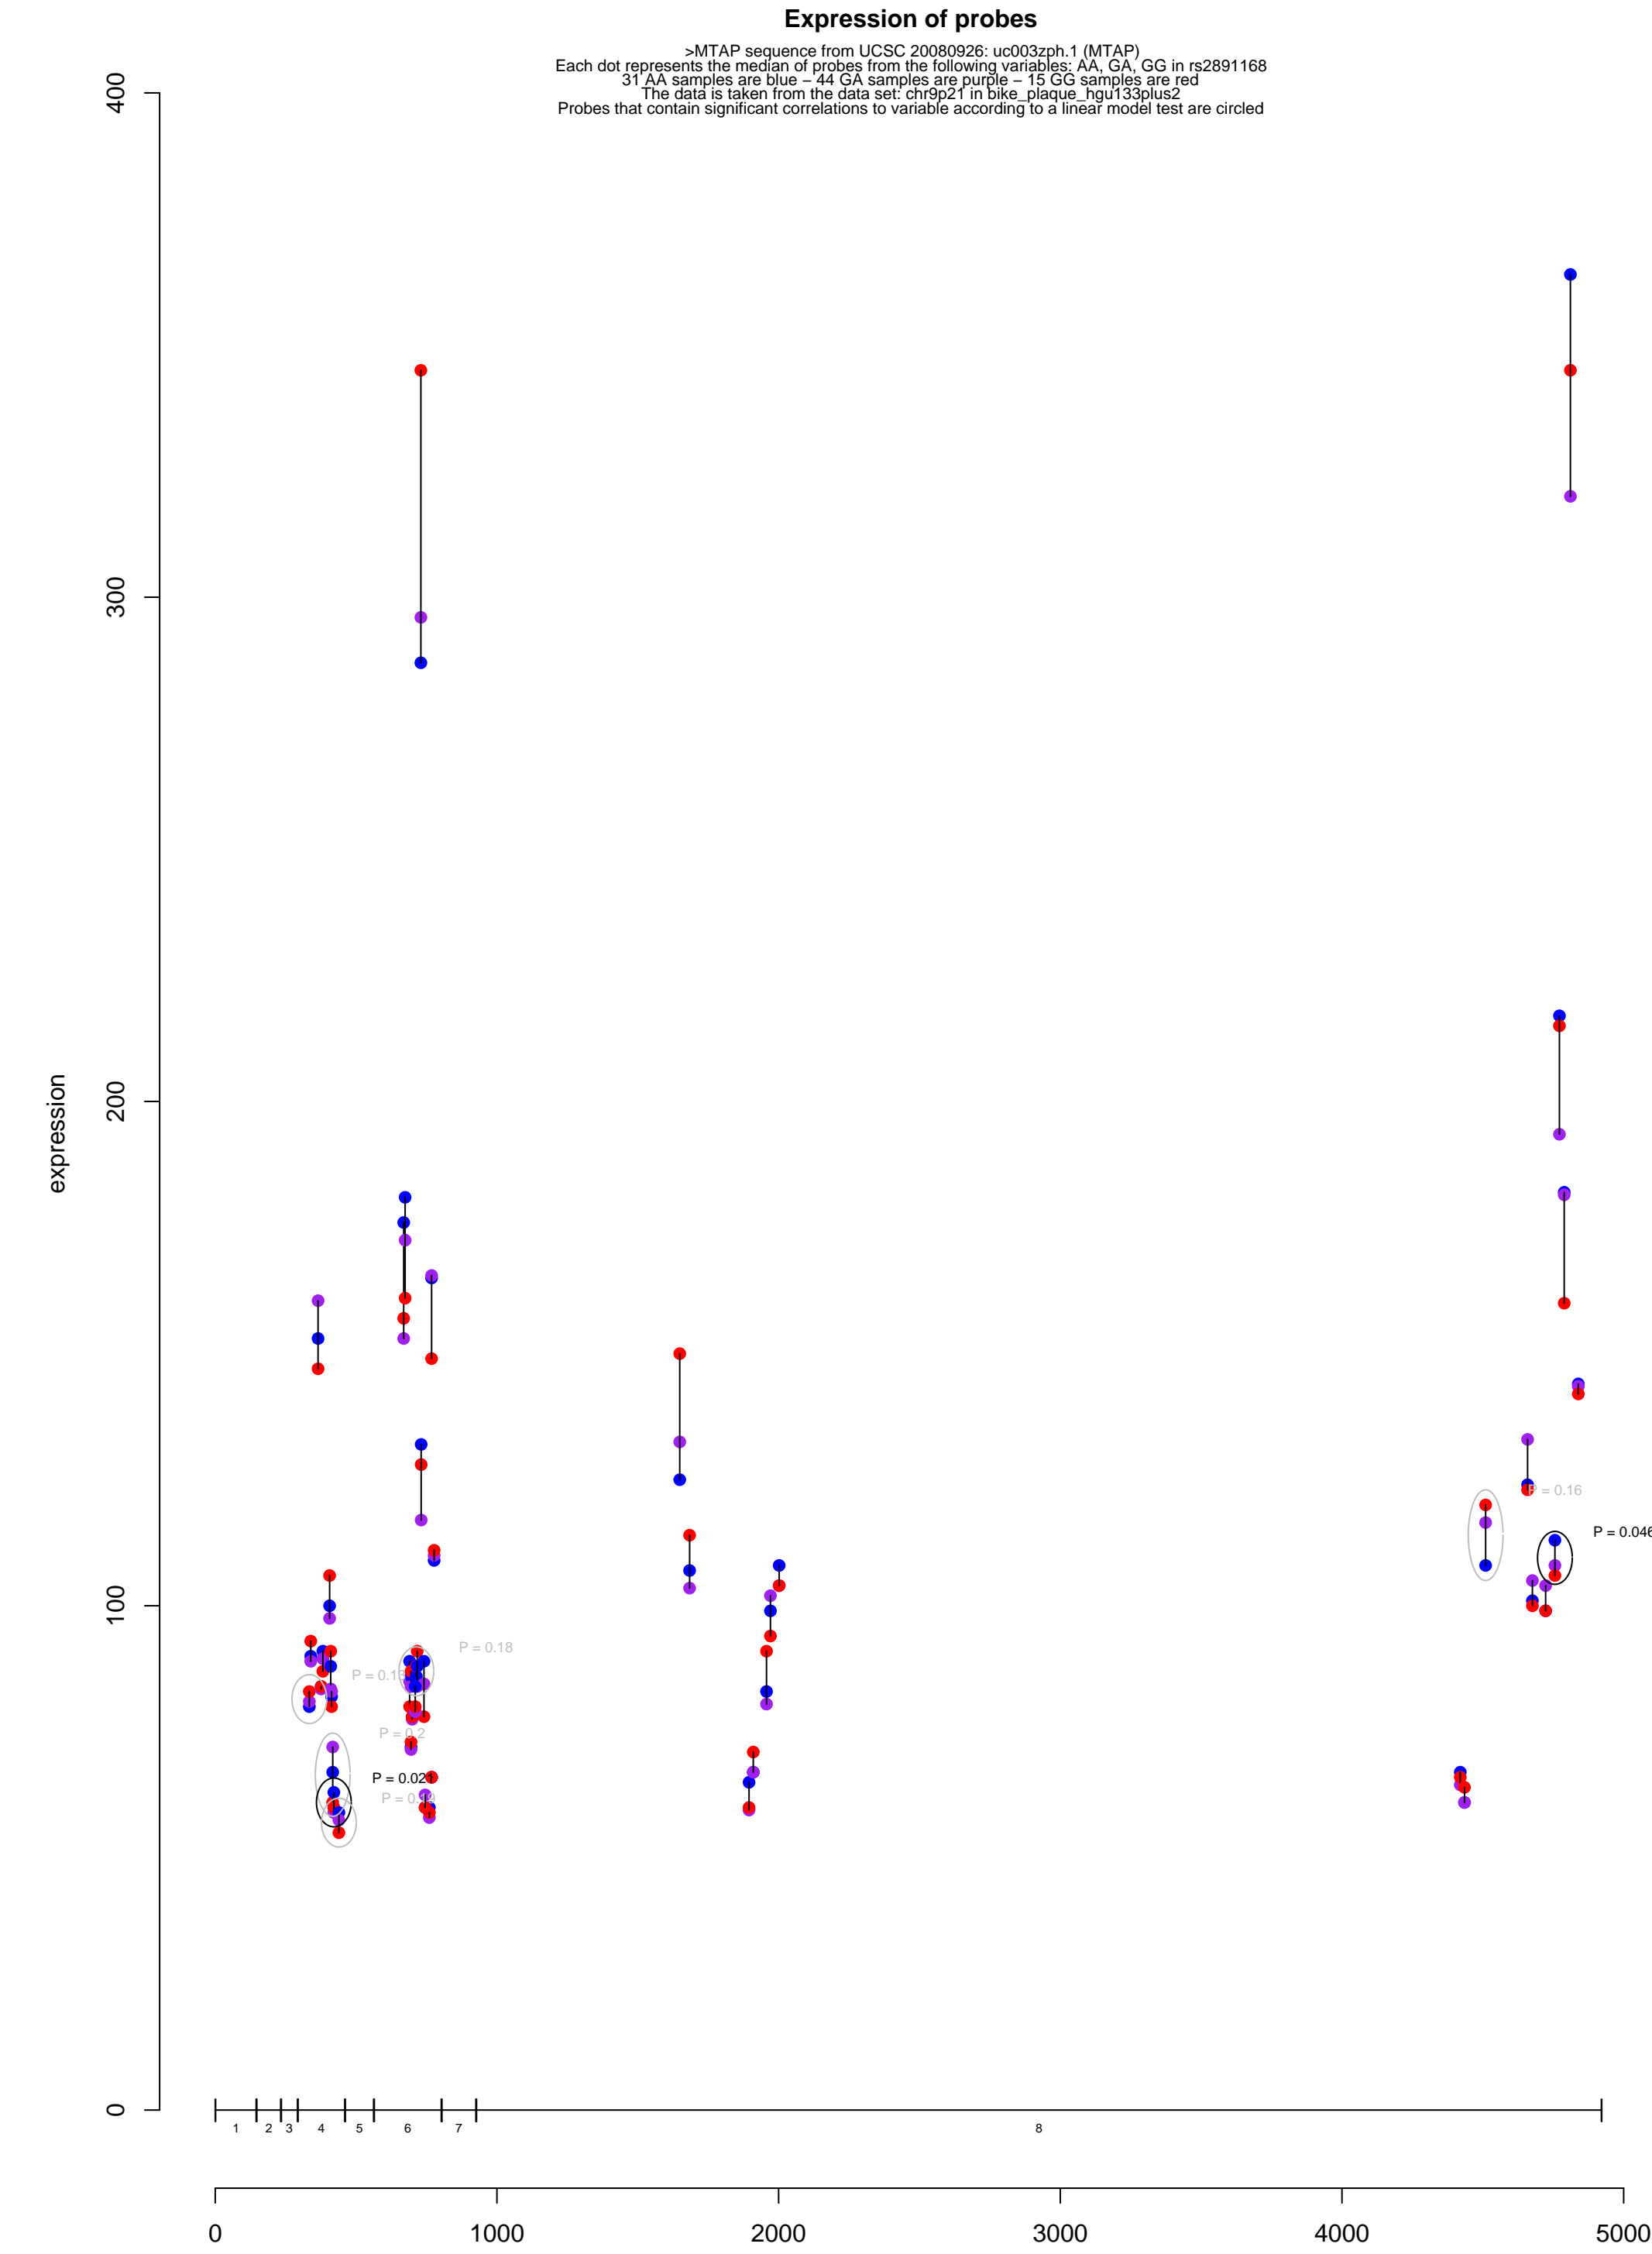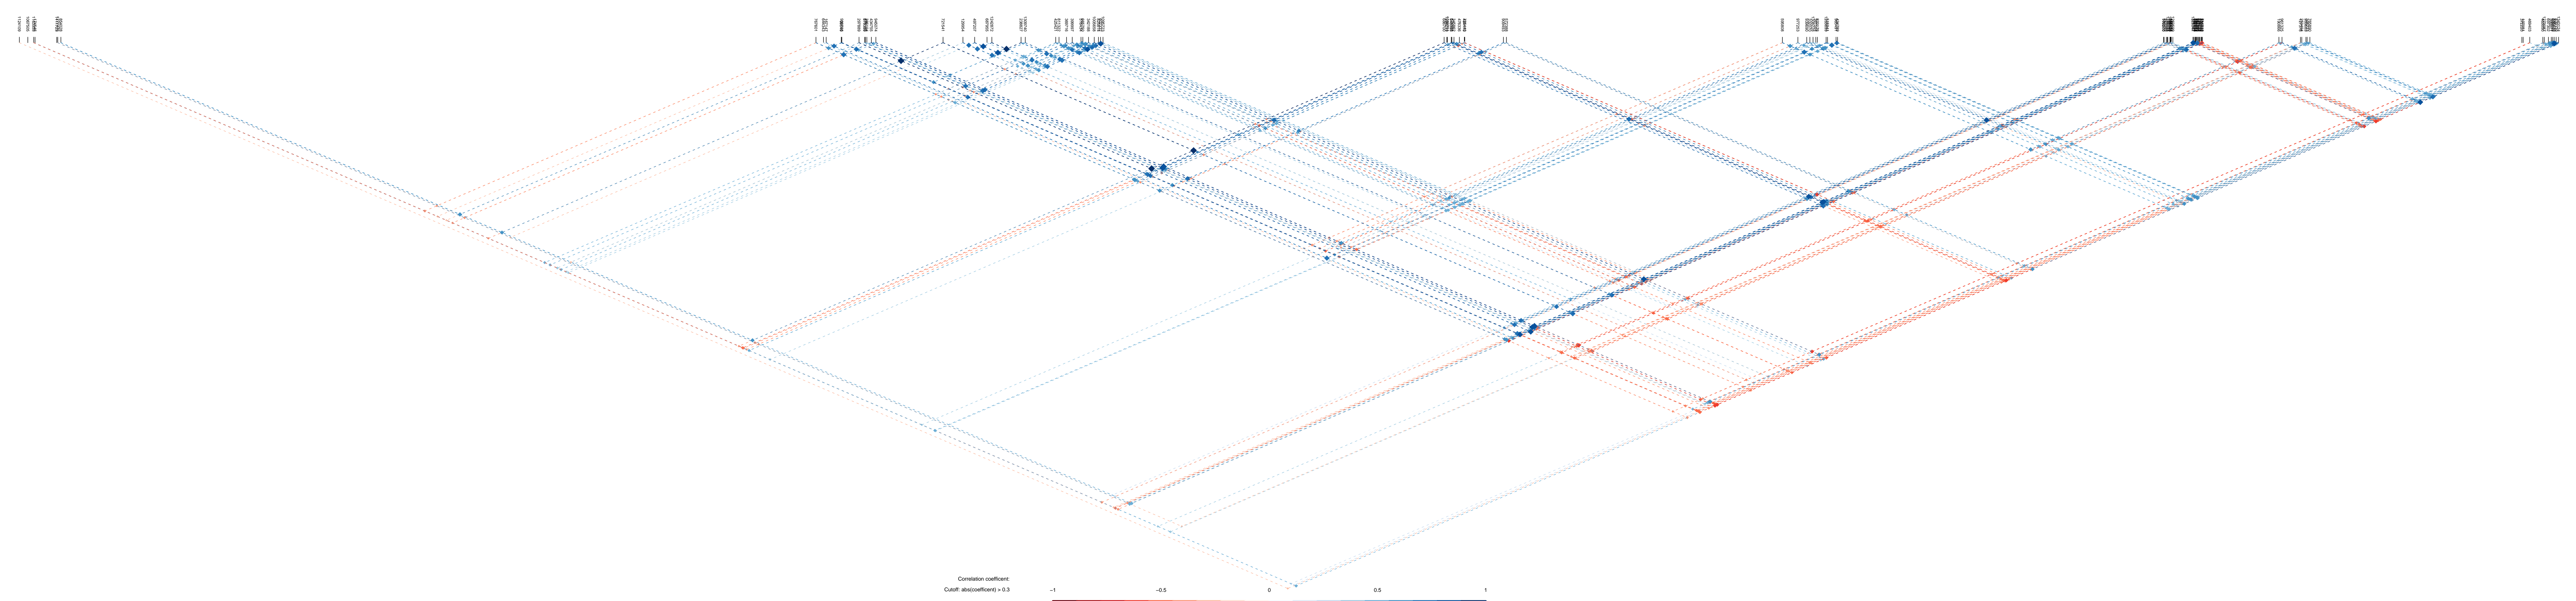

Supplement: pone.0007677.s003.pdf [file pone.0007677.s003.pdf]
