# Supplementary material for: Relationship between CAD Risk Genotype in the Chromosome 9p21 Locus and Gene Expression. Identification of Eight New ANRIL Splice Variants
Source: PubMed Central journal article supplement (PMC2765615; doi:10.1371/journal.pone.0007677), 2009-11-02

# ASAP\_AMed

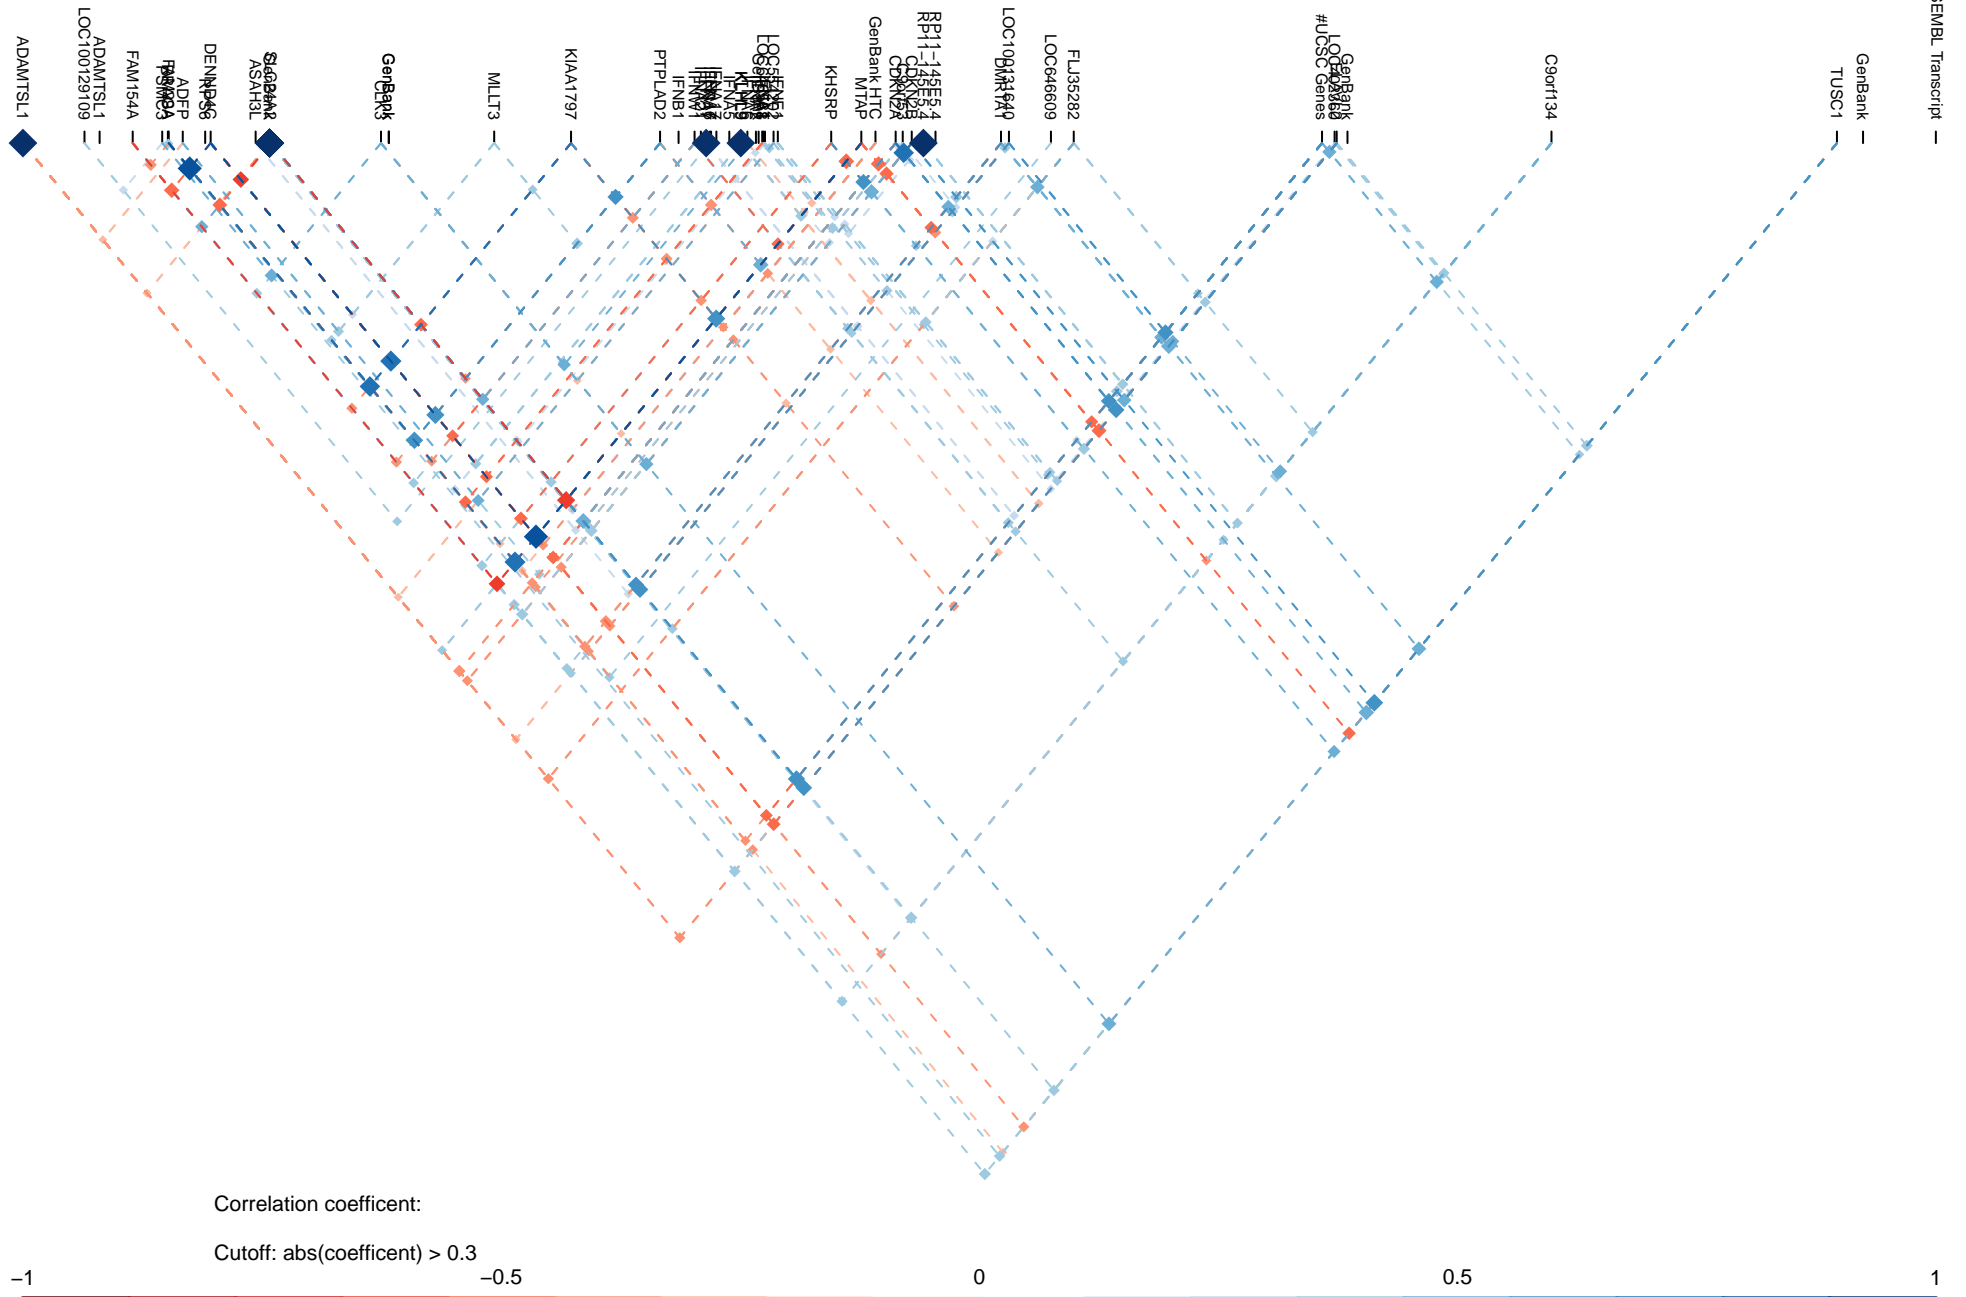

# ASAP\_MMed

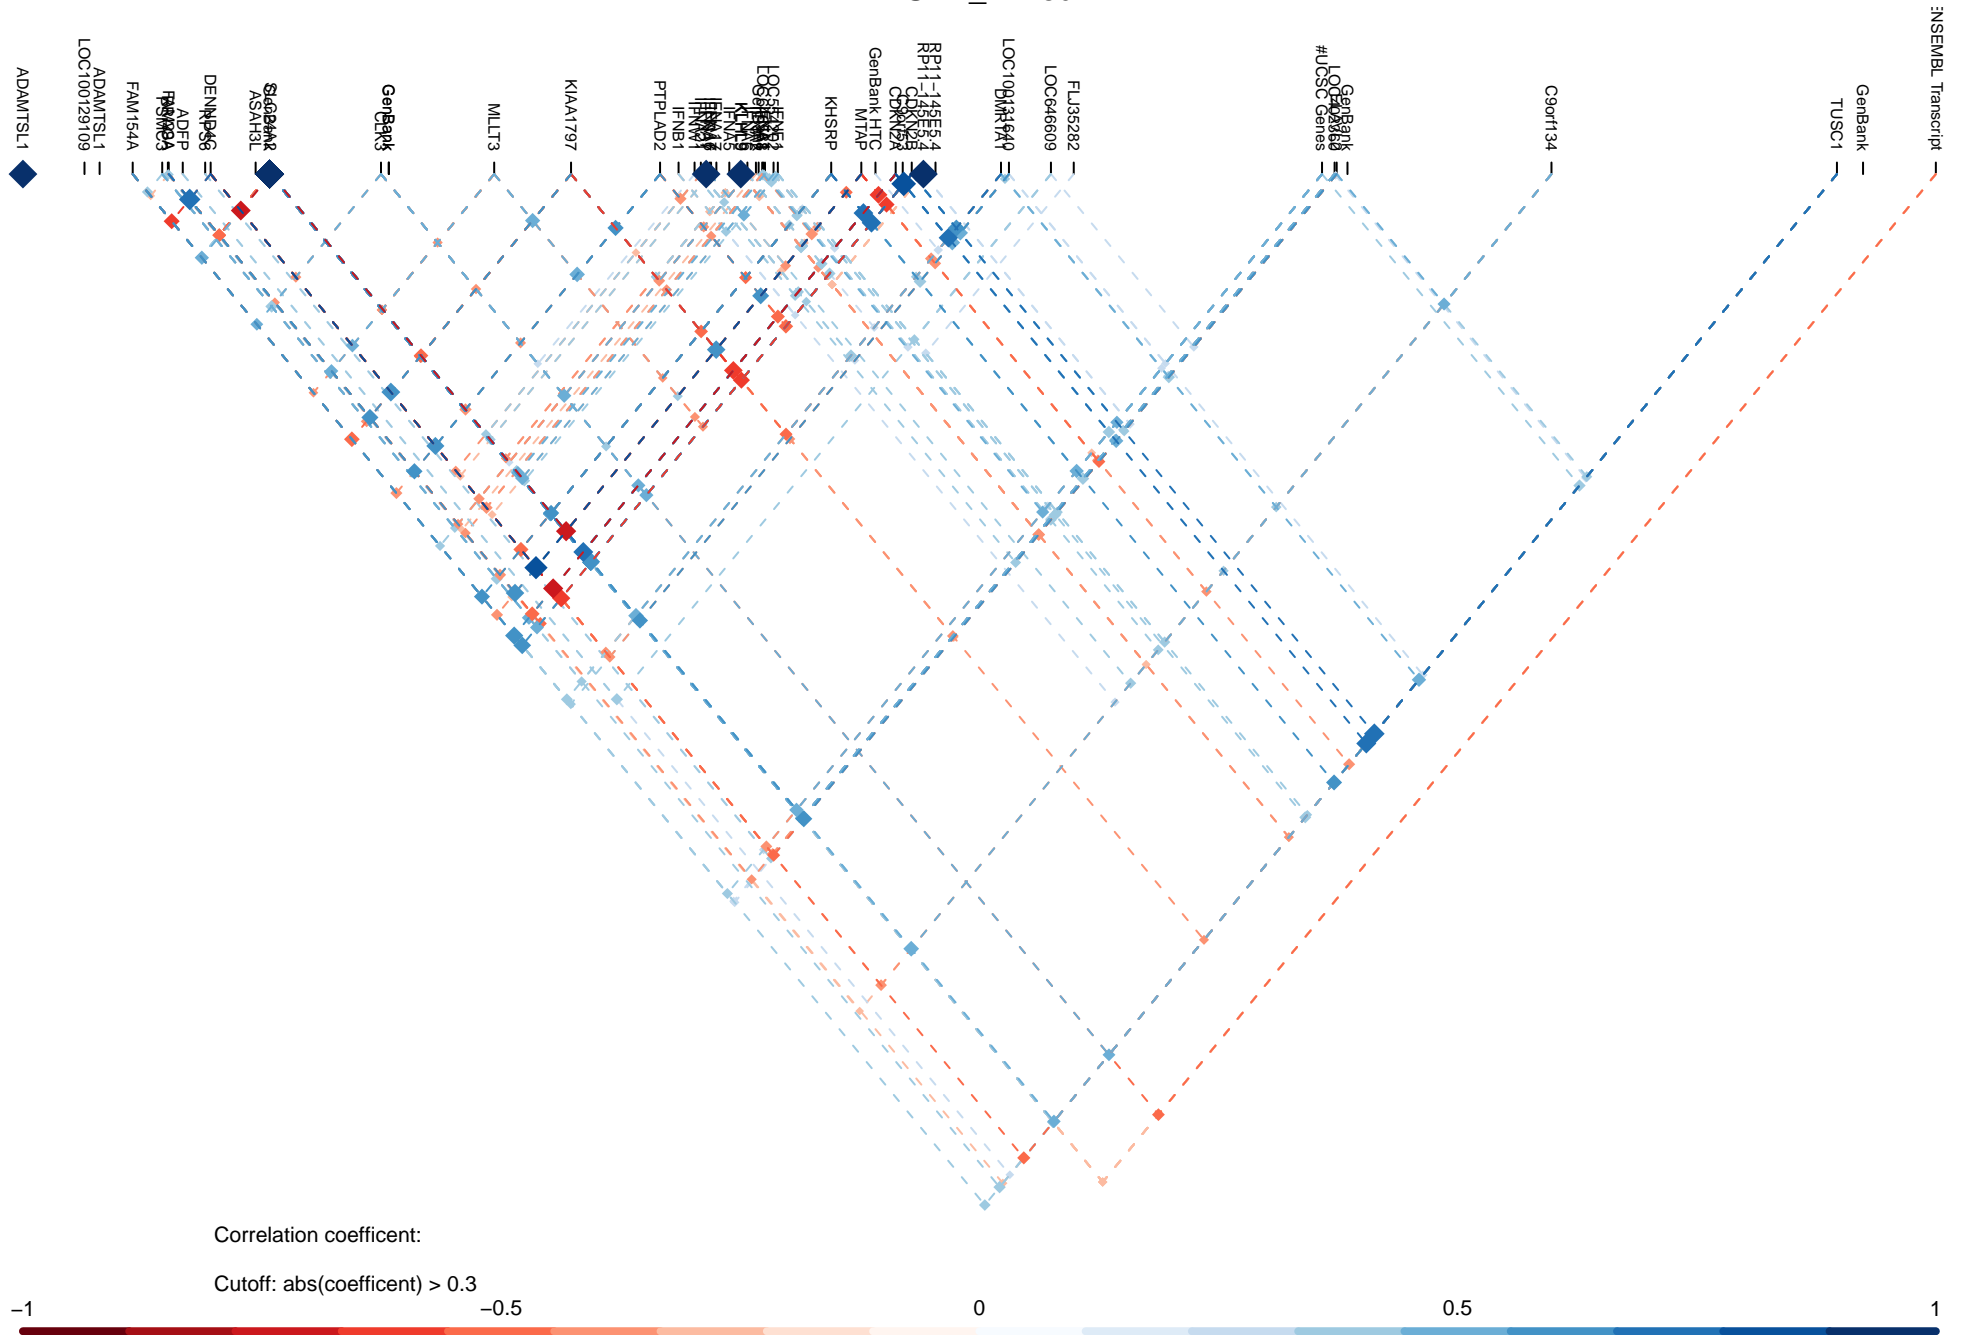

### GSE7851\_ceu\_only

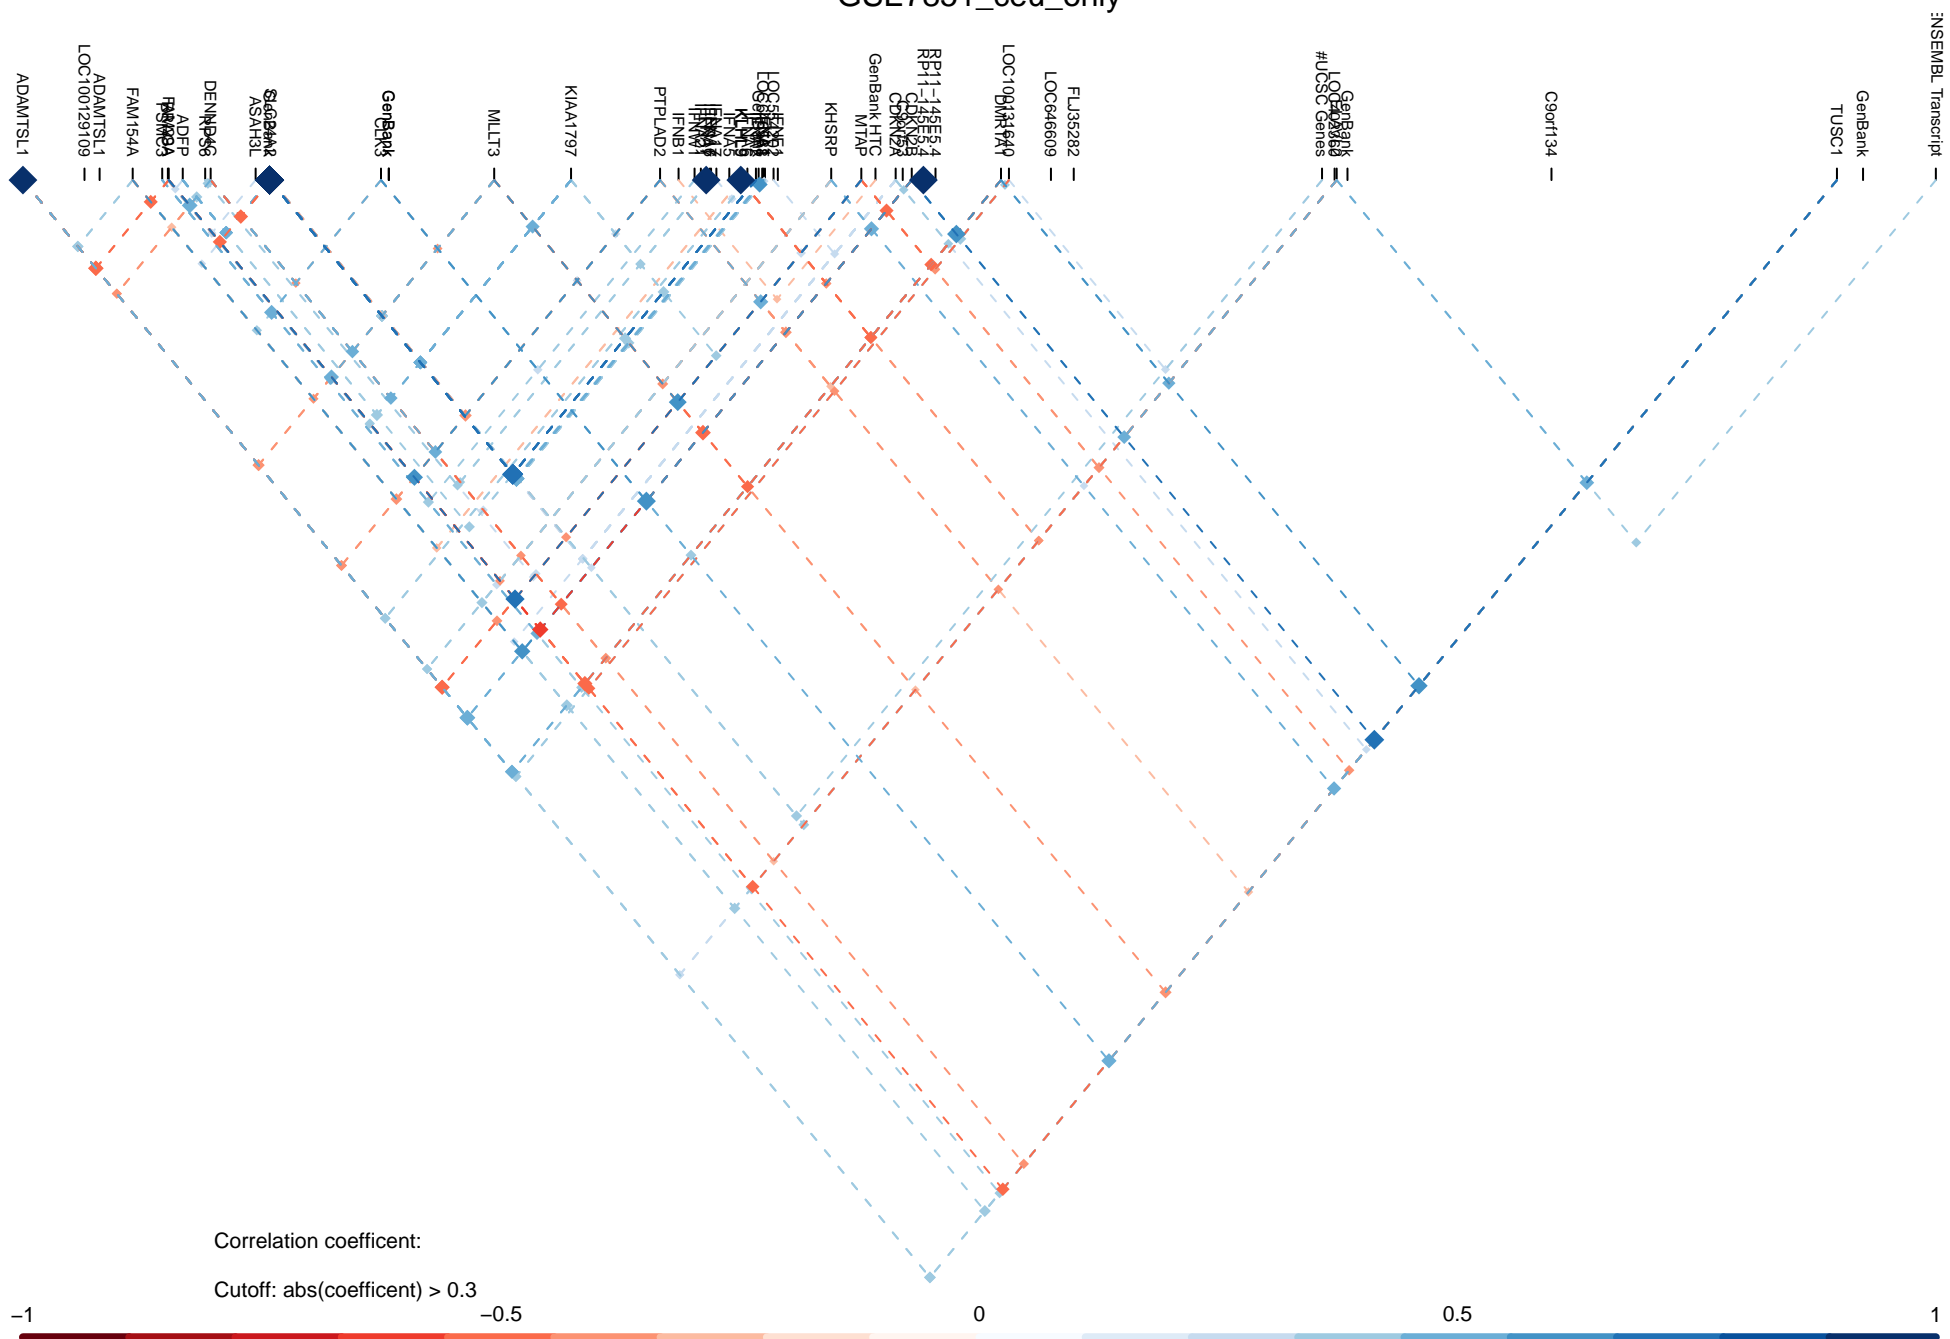

# GSE9372

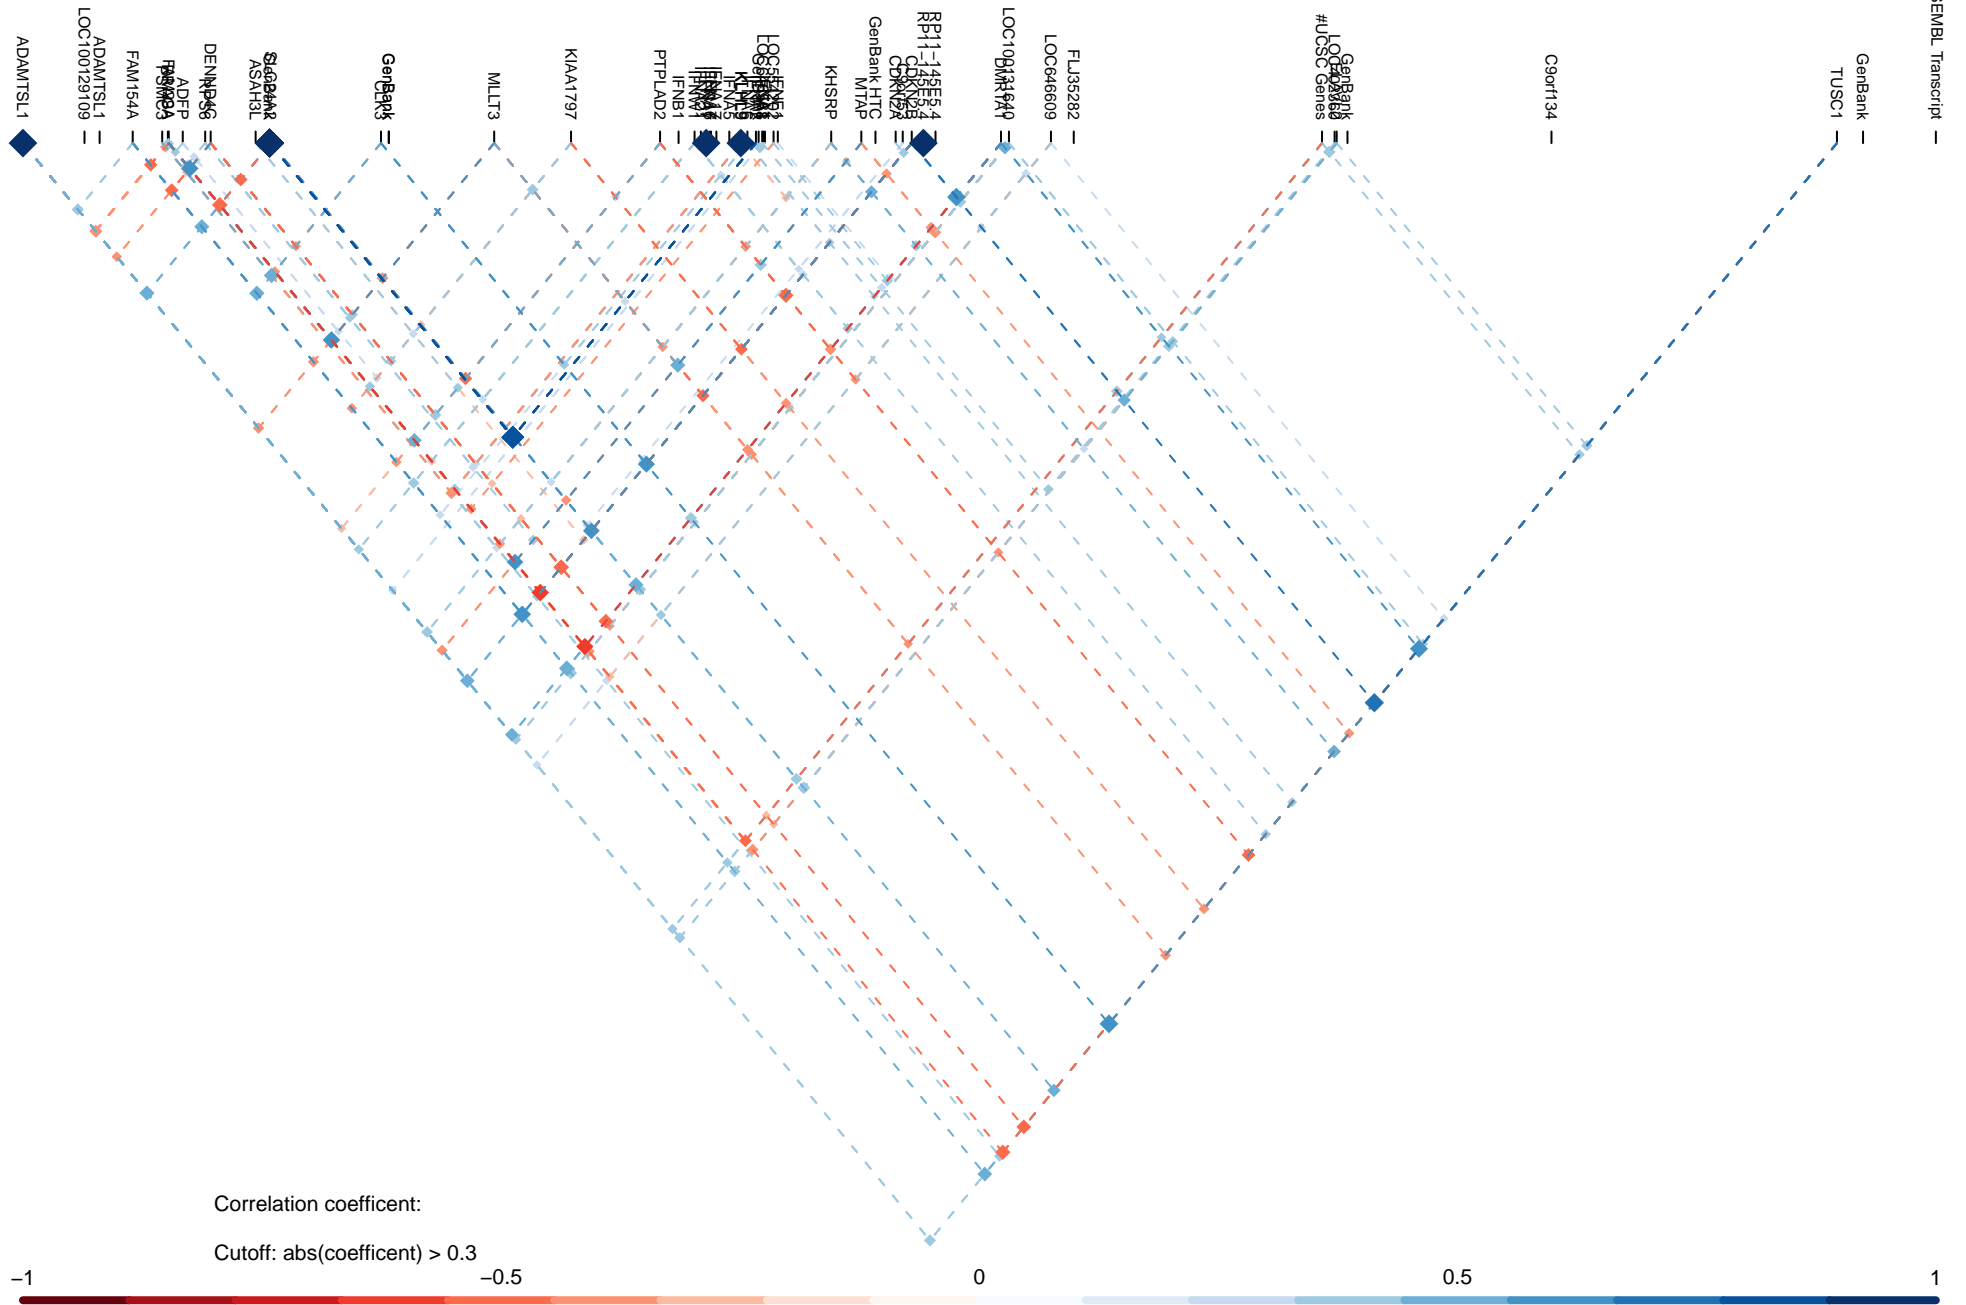

Supplement: pone.0007677.s006.pdf [file pone.0007677.s006.pdf]
